# Supplementary material for: Continuous 2-Methyl-3-butyn-2-ol Selective Hydrogenation on Pd/γ-Al2O3 as a Green Pathway of Vitamin A Precursor Synthesis
Source: MDPI journal article supplement (doi:10.3390/catal11040501), 2021-04-15
Supplement: s1 [file s1]

## Article

# Continuous 2-Methyl-3-Butyn-2-ol Selective Hydrogenation on Pd/ $\gamma$ -Al<sub>2</sub>O<sub>3</sub> as a Green Pathway of Vitamin A Precursor Synthesis

Antonio J. Fernández-Ropero <sup>1</sup>, Bartosz Zawadzki <sup>1</sup>, Emil Kowalewski <sup>1</sup>, Izabela S. Pieta <sup>1</sup>, Mirosław Krawczyk <sup>1</sup>, Krzysztof Matus <sup>2</sup>, Dmytro Lisovyt'skiy <sup>1</sup> and Anna Śrębowata <sup>1,\*</sup>

<sup>1</sup> Institute of Physical Chemistry, Polish Academy of Sciences, ul. Kasprzaka 44/52, 01-224 Warsaw, Poland; ajfropero@ichf.edu.pl (A.J.F.-R.); bzawadzki@ichf.edu.pl (B.Z.); ekowalewski@ichf.edu.pl (E.K.); ipieta@ichf.edu.pl (I.S.P.); mkrawczyk@ichf.edu.pl (M.K.); dlistovyt'skiy@ichf.edu.pl (D.L.)

<sup>2</sup> Materials Research Laboratory, Silesian University of Technology, Konarskiego 18A, 44-100 Gliwice, Poland; Krzysztof.Matus@polsl.pl

\* Correspondence: asrebowata@ichf.edu.pl; Tel.: +48-22-343-3320

**Citation:** Fernández-Ropero, A.J.; Zawadzki, B.; Kowalewski, E.; Pieta, I.S.; Krawczyk, M.; Matus, K.; Lisovyt'skiy, D.; Śrębowata, A. Continuous 2-Methyl-3-Butyn-2-ol Selective Hydrogenation on Pd/ $\gamma$ -Al<sub>2</sub>O<sub>3</sub> as a Green Pathway of Vitamin A Precursor Synthesis. *Catalysts* **2021**, *11*, 501. <https://doi.org/10.3390/catal11040501>

Academic Editor: Kei Manabe and Nicola Della Ca

Received: 29 January 2021

Accepted: 12 April 2021

Published: 15 April 2021

**Publisher's Note:** MDPI stays neutral with regard to jurisdictional claims in published maps and institutional affiliations.

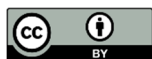

**Copyright:** © 2021 by the authors. Licensee MDPI, Basel, Switzerland. This article is an open access article distributed under the terms and conditions of the Creative Commons Attribution (CC BY) license (<http://creativecommons.org/licenses/by/4.0/>).

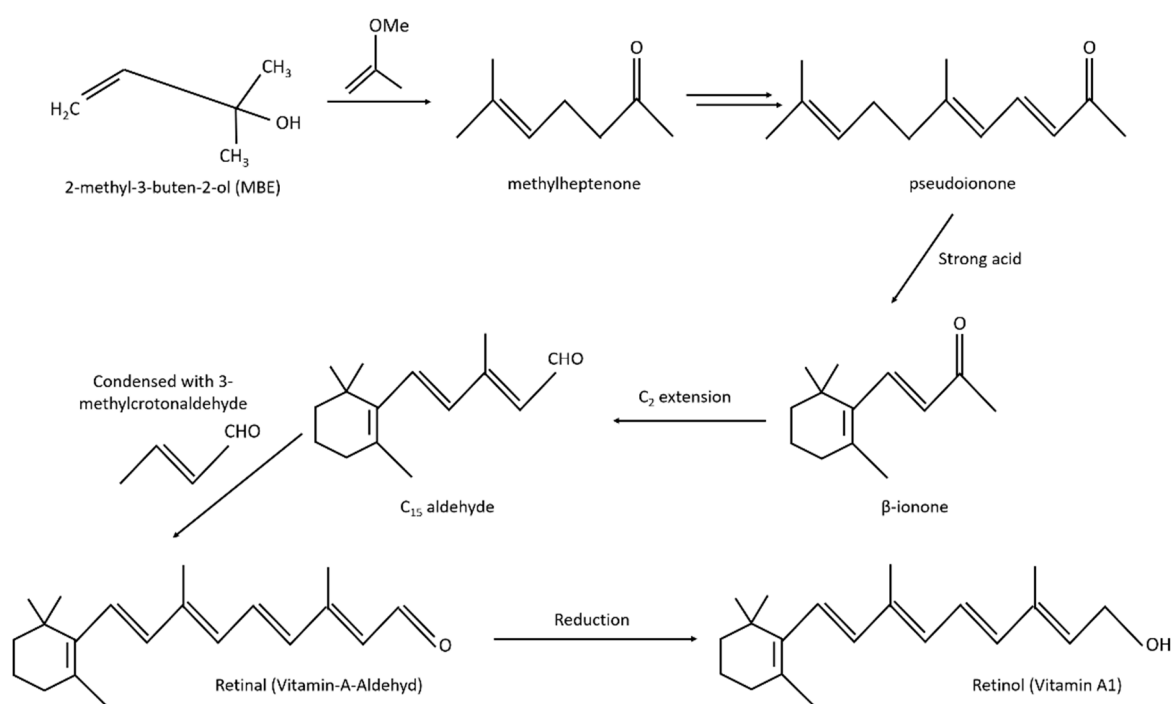

**Scheme S1.** Scheme of vitamin A synthesis with 2-methyl-3-buten-2-ol as one of the substrate [Eggersdorfer, M.; Laudert, D.; Létinois, U.; McClymont, T.; Medlock, J.; Netscher, T.; Bonrath, W. One Hundred Years of Vitamins-A Success Story of the Natural Sciences. *Angew. Chemie Int. Ed.* 2012, 51, 12960–12990].

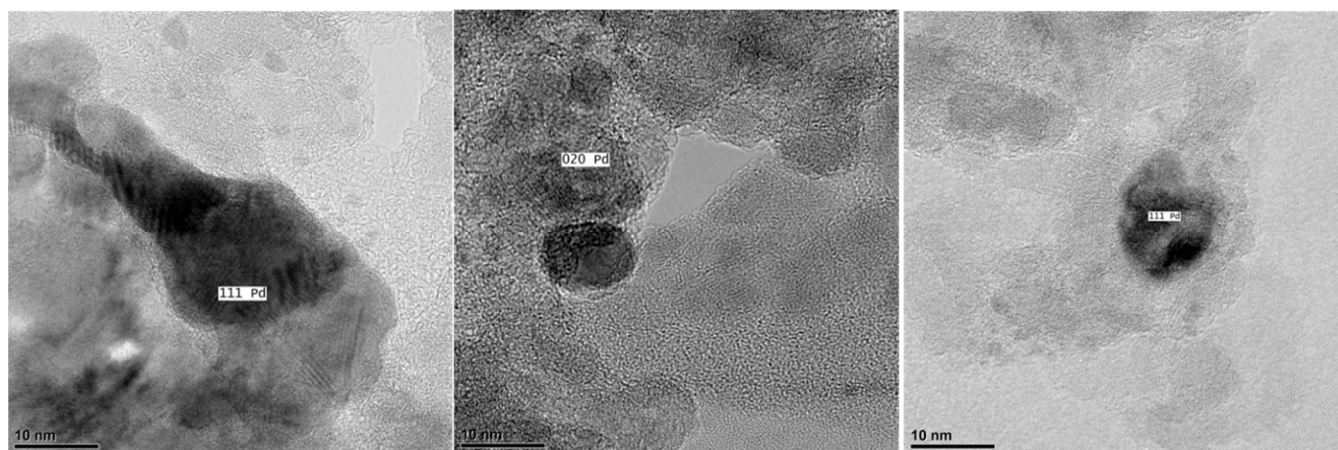

**Figure S1.** HRTEM images of red(400°C)-Pd/ $\gamma$ -Al<sub>2</sub>O<sub>3</sub>.

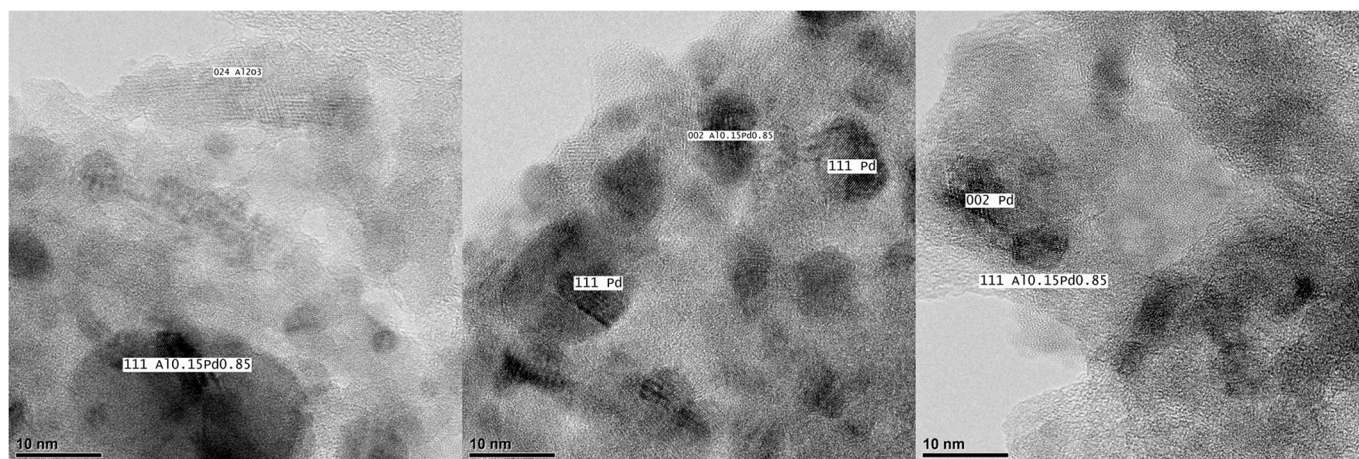

Figure S2. HRTEM images of red(600°C)-Pd/γ-Al<sub>2</sub>O<sub>3</sub>.

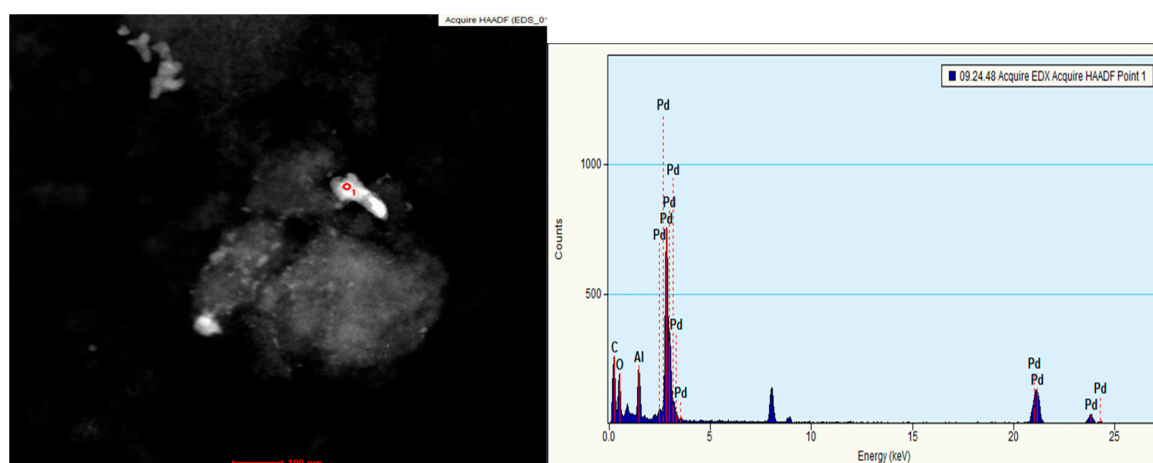

| Element | Weight% | Atomic% | Uncert.% | Detector Correction | k-Factor |
|---------|---------|---------|----------|---------------------|----------|
| O (K)   | 8.28    | 33.02   | 0.26     | 0.51                | 1.921    |
| Al (K)  | 6.78    | 16.05   | 0.16     | 0.92                | 1.033    |
| Pd (K)  | 84.93   | 50.92   | 1.15     | 0.92                | 5.849    |

Figure S3. SEM - EDS analysis of red(400°C)-Pd/γ-Al<sub>2</sub>O<sub>3</sub>.

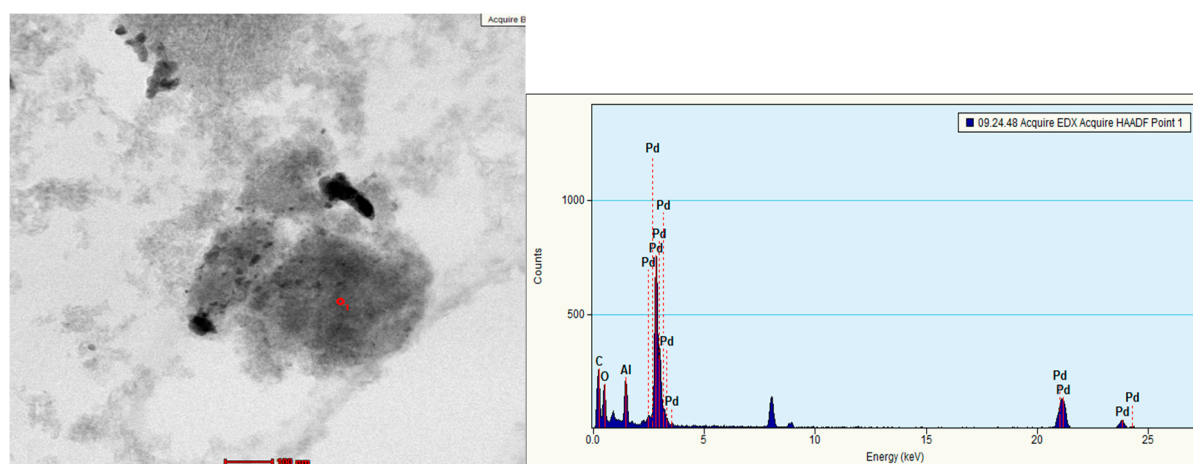

| Element | Weight % | Atomic % | Uncert. % | Detector Correction | k-Factor |
|---------|----------|----------|-----------|---------------------|----------|
| O (K)   | 50.21    | 63.50    | 1.25      | 0.51                | 1.921    |
| Al (K)  | 48.26    | 36.20    | 0.88      | 0.92                | 1.033    |
| Pd (K)  | 1.52     | 0.28     | 0.68      | 0.92                | 5.849    |

**Figure S4.** TEM-EDS analysis of red(400°C)-Pd/ $\gamma$ -Al<sub>2</sub>O<sub>3</sub>.

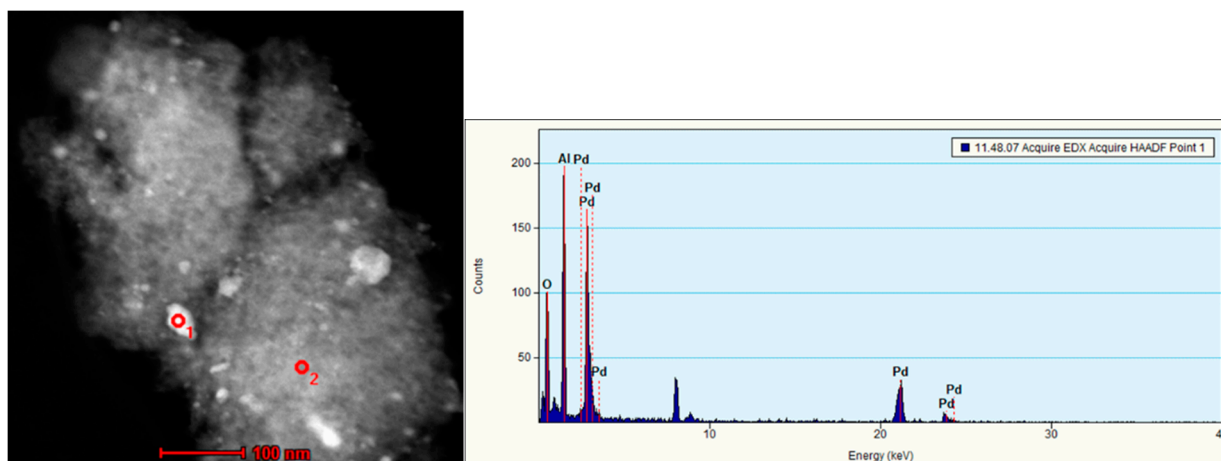

| Element | Weight % | Atomic % | Uncert. % | Detector Correction | k-Factor |
|---------|----------|----------|-----------|---------------------|----------|
| O (K)   | 20.17    | 45.66    | 0.85      | 0.51                | 1.921    |
| Al (K)  | 27.10    | 36.38    | 0.65      | 0.92                | 1.033    |
| Pd (K)  | 52.72    | 17.94    | 2.00      | 0.92                | 5.849    |

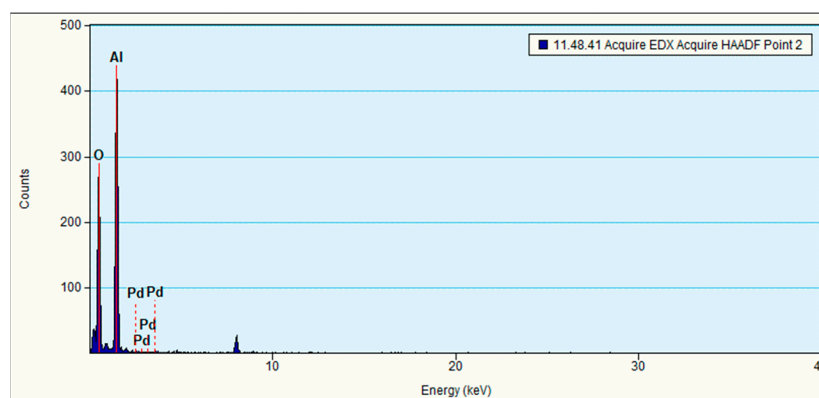

| Element | Weight % | Atomic % | Uncert. % | Detector Correction | k-Factor |
|---------|----------|----------|-----------|---------------------|----------|
| O (K)   | 52.79    | 65.35    | 1.01      | 0.51                | 1.921    |
| Al (K)  | 47.20    | 34.64    | 0.69      | 0.92                | 1.033    |
| Pd (K)  | 0.00     | 0.00     | 100.00    | 0.92                | 5.849    |

Figure S5. TEM-EDS analysis of red(600°C)-Pd/ $\gamma$ -Al<sub>2</sub>O<sub>3</sub>.

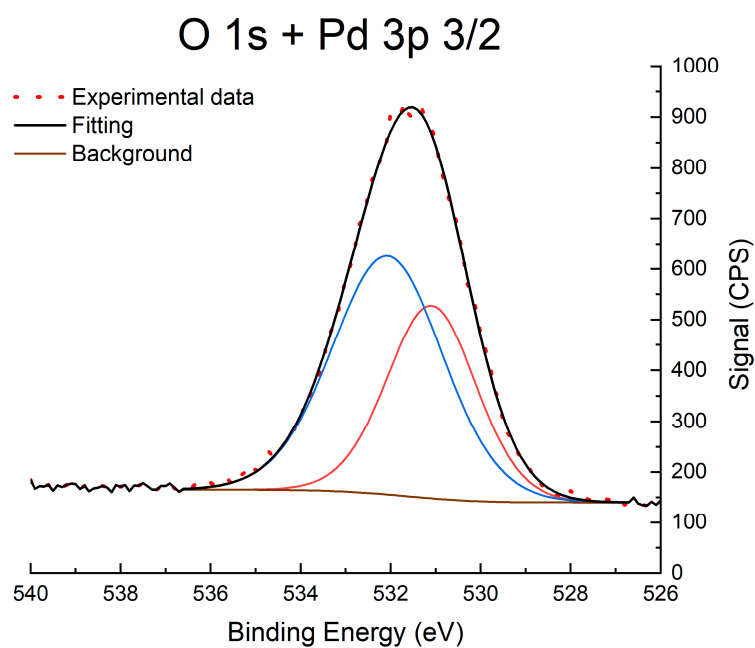

**Figure S6.** O1s + Pd3p<sub>3/2</sub> XPS region of red(400°C)-Pd/γ-Al<sub>2</sub>O<sub>3</sub>.

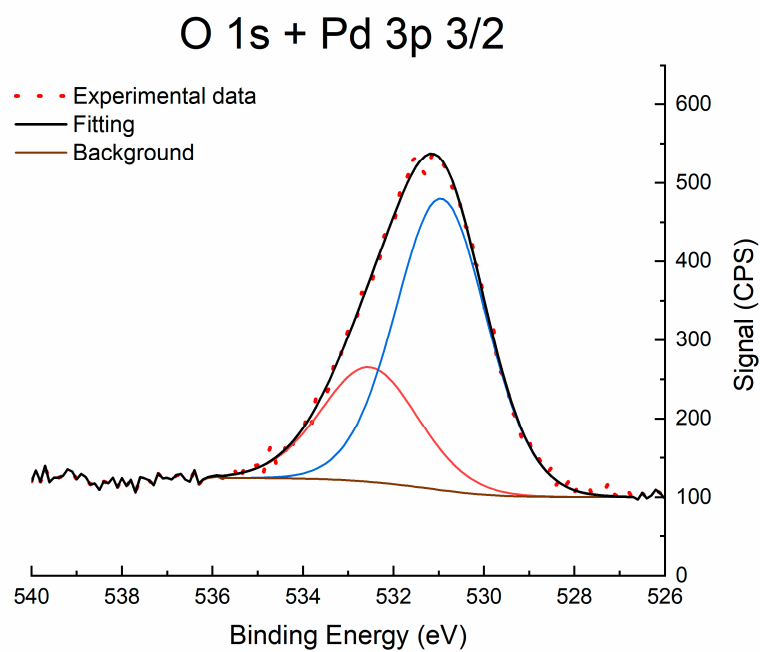

**Figure S7.** O1s + Pd3p<sub>3/2</sub> XPS region of red(600°C)-Pd/γ-Al<sub>2</sub>O<sub>3</sub>.

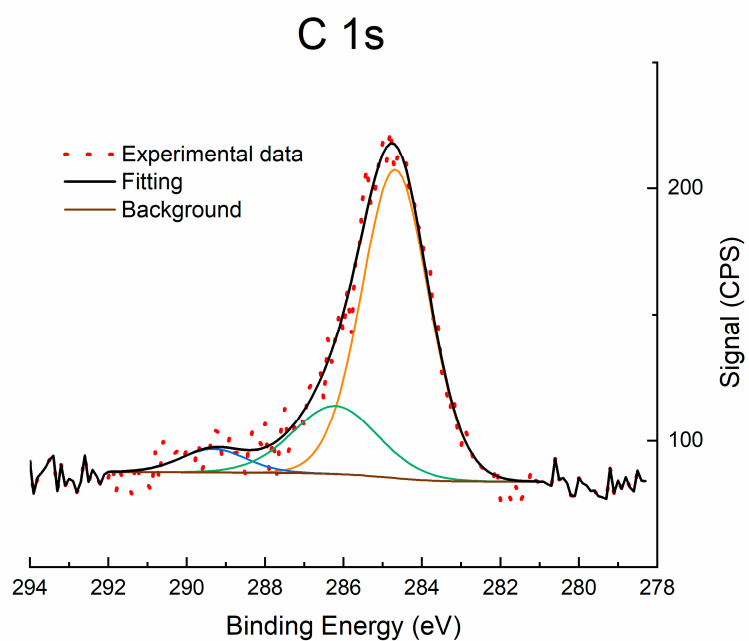

**Figure S8.** C 1s XPS region of red(400°C)-Pd/ $\gamma$ -Al<sub>2</sub>O<sub>3</sub>.

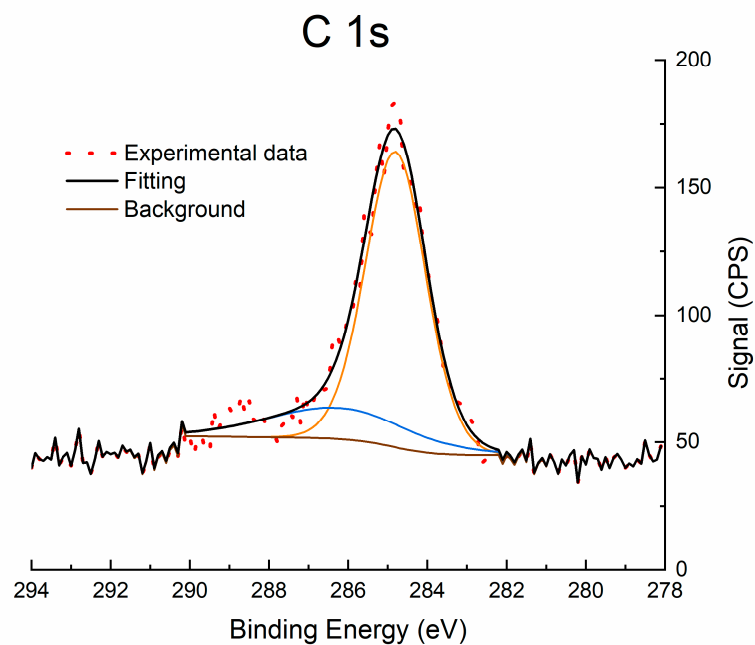

**Figure S9.** C 1s XPS region of red(600°C)-Pd/ $\gamma$ -Al<sub>2</sub>O<sub>3</sub>.
